# Supplementary material for: Effective Early Treatment of Microcystis Exponential Growth and Microcystin Production with Hydrogen Peroxide and Hydroxyapatite
Source: MDPI journal article supplement (doi:10.3390/toxins15010003), 2022-12-20
Supplement: s1 [file s1]

## Article

# Effective Early Treatment of *Microcystis* Exponential Growth and Microcystin Production with Hydrogen Peroxide and Hydroxyapatite

Ian Struewing, Nathan Sienkiewicz, Chiqian Zhang, Nicholas Dugan and Jingrang Lu

Table S1. Formula for Low N BG-11

| Low N BG-11                            | mg·L <sup>-1</sup> |
|----------------------------------------|--------------------|
| Calcium chloride dihydrate             | 36                 |
| EDTA disodium magnesium                | 1                  |
| Magnesium sulfate • 7H <sub>2</sub> O  | 75                 |
| Potassium phosphate dibasic            | 40                 |
| Sodium bicarbonate                     | 0                  |
| Sodium nitrate                         | 15                 |
| Citric acid                            | 6                  |
| Ferric EDTA                            | 8.6                |
| Zinc sulfate • 7H <sub>2</sub> O       | 0.222              |
| Boric acid                             | 2.86               |
| Cobalt nitrate • 6H <sub>2</sub> O     | 0.0494             |
| Cupric sulfate • 5H <sub>2</sub> O     | 0.079              |
| Manganese chloride • 4H <sub>2</sub> O | 1.81               |
| Sodium molybdate • 2H <sub>2</sub> O   | 0.39               |
| Sodium chloride                        | 1000               |

Table S2. Summary of experimental conditions

| Culture                                      | Medium | Volume (mL) | Starting concentration (cells·mL <sup>-1</sup> ) |
|----------------------------------------------|--------|-------------|--------------------------------------------------|
| Stock                                        | BG-11  | 200         | -                                                |
| Growth curves                                | LowN   | 1000        | 10 <sup>2</sup> or 10 <sup>3</sup>               |
| HAP particle size                            | Low N  | 200         | 5 × 10 <sup>3</sup>                              |
| HAP conc.                                    | LowN   | 200         | 10 <sup>4</sup>                                  |
| H <sub>2</sub> O <sub>2</sub> conc.          | LowN   | 200         | 10 <sup>4</sup>                                  |
| H <sub>2</sub> O <sub>2</sub> low cell conc. | Low N  | 1000        | 10 <sup>2</sup>                                  |

A

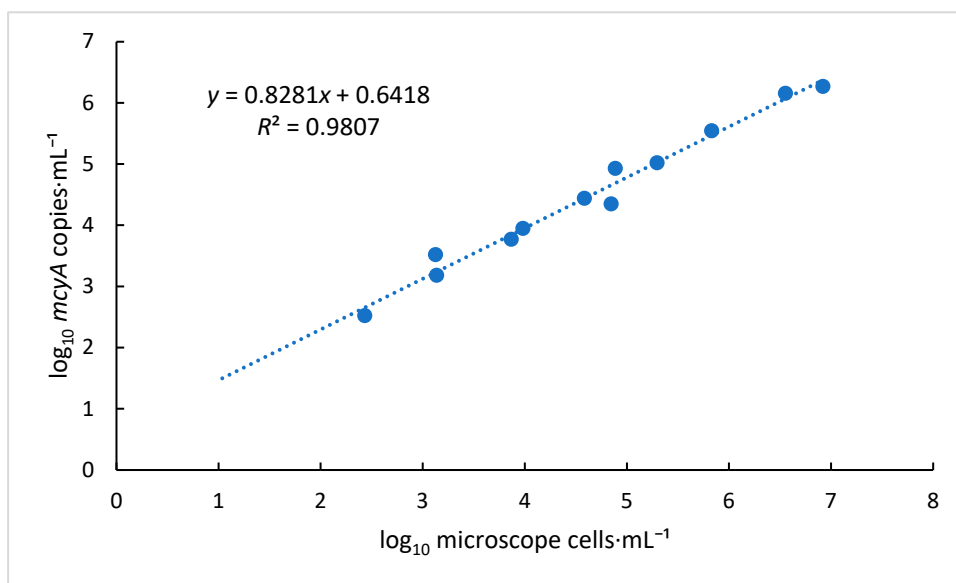

B

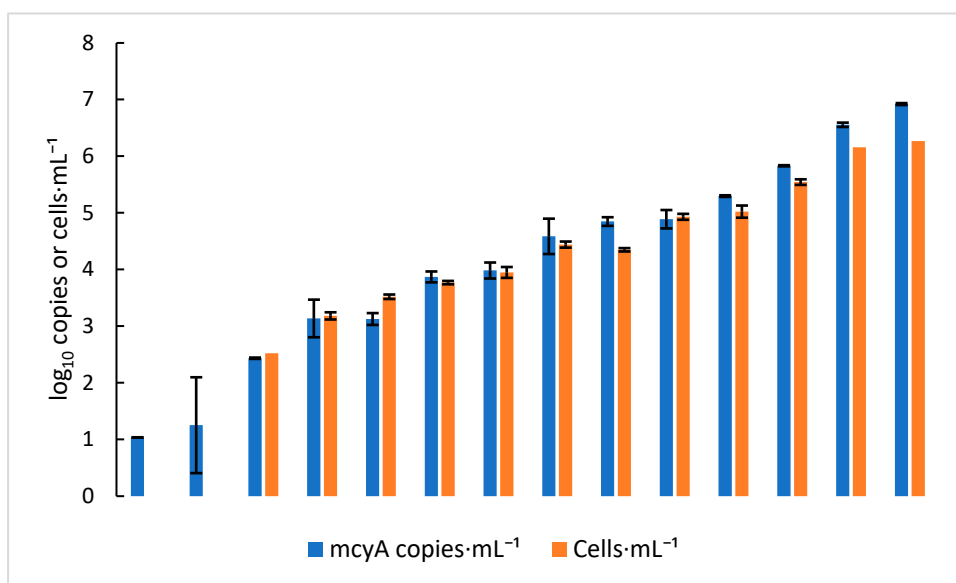

**Figure S1. Linear regression between *mcyA* gene abundance detected by qPCR (copies·mL<sup>-1</sup>) and microscopic counts (cells·mL<sup>-1</sup>).** (A) . Regression of the *mcyA* gene abundance  $\log_{10}$  copies·mL<sup>-1</sup> compared to microscopy counts  $\log_{10}$  cell·mL<sup>-1</sup> showing correlation between gene copies and cell counts (B) Average  $\log_{10}$  copy·mL<sup>-1</sup> and  $\log_{10}$  cell·mL<sup>-1</sup> for each sampling event; error bars represent standard deviation of duplicate samples.

A.

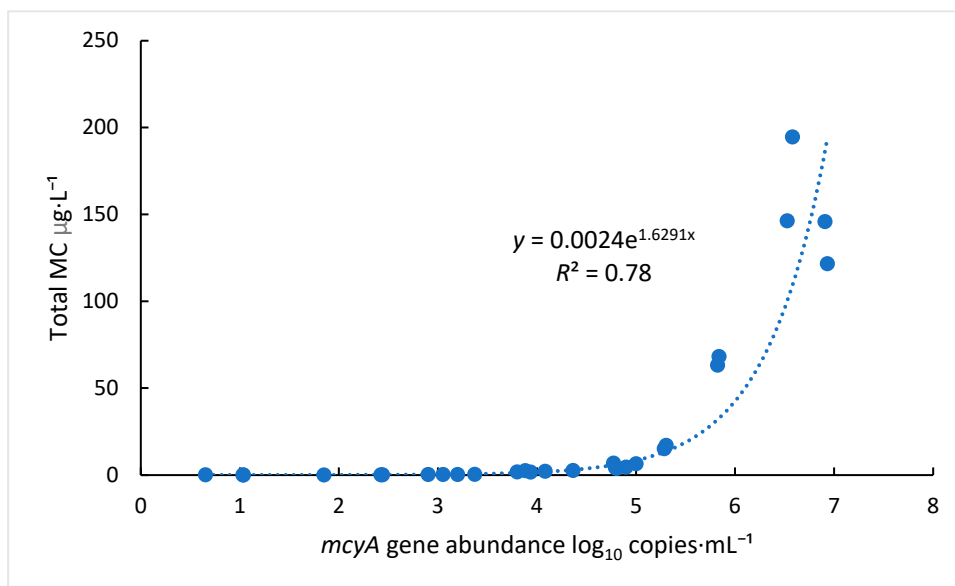

B.

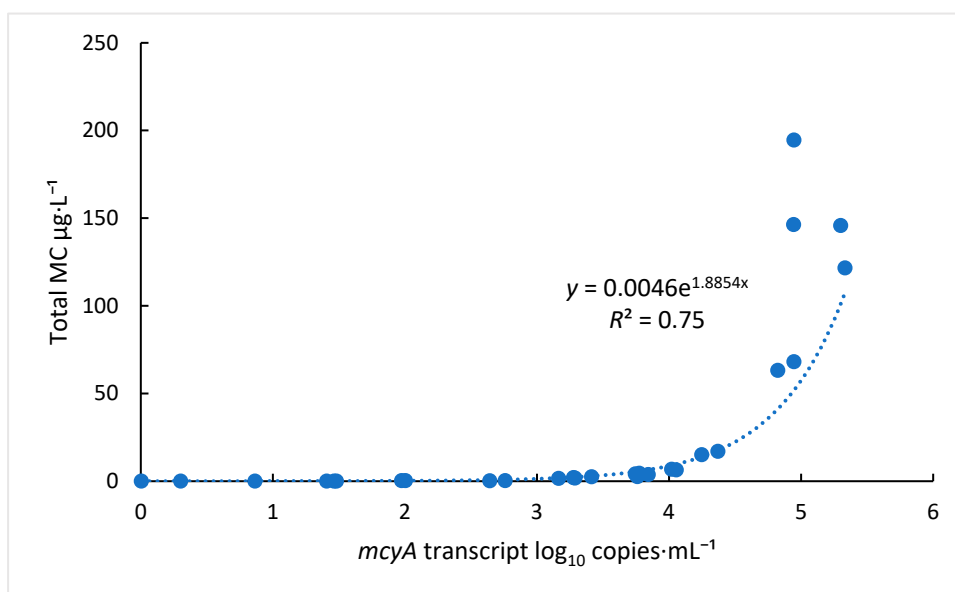

**Figure S2. Regression of total MC concentration ( $\mu\text{g}\cdot\text{L}^{-1}$ ) compared to (A)  $\log_{10}$  *mcyA* gene abundance  $\text{copies}\cdot\text{mL}^{-1}$  and (B)  $\log_{10}$  *mcyA* transcript  $\text{copies}\cdot\text{mL}^{-1}$  showing exponential increase of MC concentration after a cell concentration of  $4 \log_{10}$  copy  $\cdot\text{mL}^{-1}$  is reached.**

A.

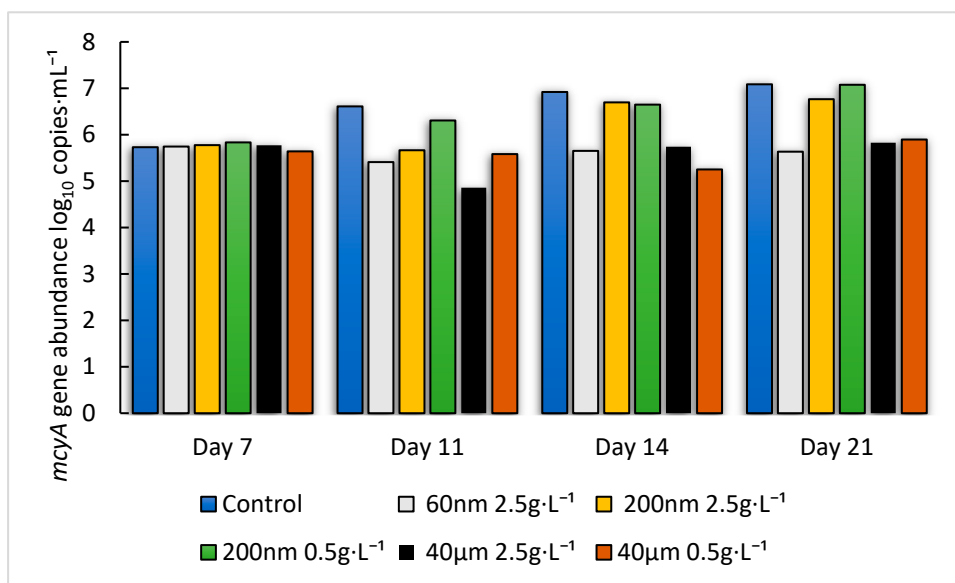

B.

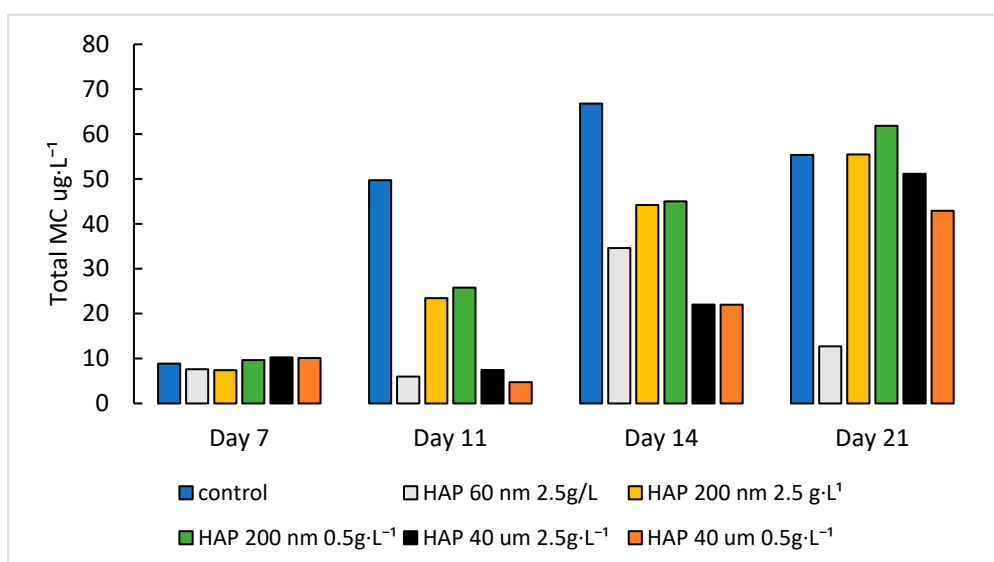

**Figure S3.** Effect of HAP particle size and concentration on average concentration of (A) *mcvA* gene abundance  $\log_{10}$  copies·mL<sup>-1</sup> and (B) MC  $\mu\text{g}\cdot\text{L}^{-1}$  of *Microcystis* cultures treated with different size and concentrations of HAP.

A.

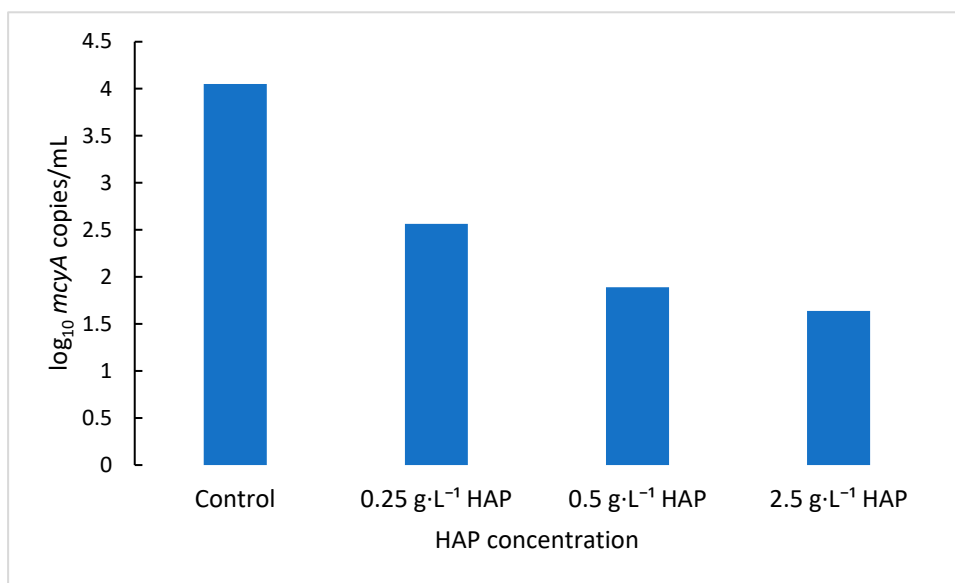

B.

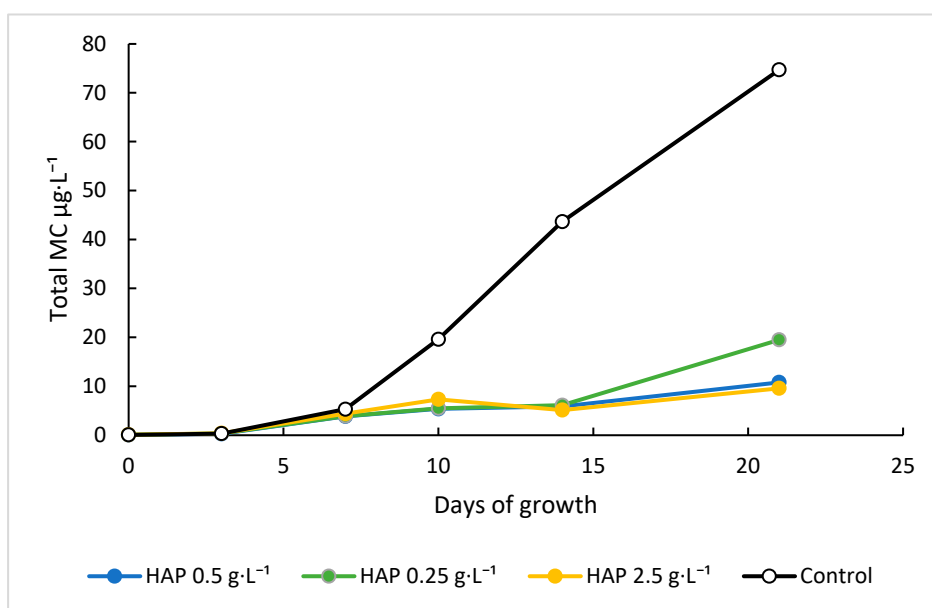

**Figure S4.** Effect of 40 μm HAP treatment at different concentrations on (A) *mcyA* gene abundance  $\log_{10}$  copies·mL<sup>-1</sup> after 21 days of growth after treatment on day seven for 2.5 g·L<sup>-1</sup> or days 4, 7, 10, and 14 for 0.5 g·L<sup>-1</sup> and 0.25 g·L<sup>-1</sup> of HAP showing that increased HAP concentration lowered cell concentration and (B) Total MC concentration measured in cultures treated with different concentrations of HAP.

**Disclaimer/Publisher's Note:** The statements, opinions and data contained in all publications are solely those of the individual author(s) and contributor(s) and not of MDPI and/or the editor(s). MDPI and/or the editor(s) disclaim responsibility for any injury to people or property resulting from any ideas, methods, instructions or products referred to in the content.
